# Supplementary material for: Bifunctionality from Synergy: CoP Nanoparticles Embedded in Amorphous CoOx Nanoplates with Heterostructures for Highly Efficient Water Electrolysis
Source: PubMed Central journal article supplement (PMC6145296; doi:10.1002/advs.201800514), 2018-07-13
Supplement: ADVS-5-1800514-s001.pdf [file ADVS-5-1800514-s001.pdf]

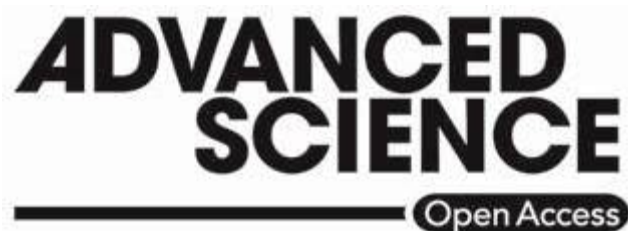

## Supporting Information

for *Adv. Sci.*, DOI: 10.1002/advs. 201800514

**Bifunctionality from Synergy: CoP Nanoparticles Embedded in Amorphous CoO<sub>x</sub> Nanoplates with Heterostructures for Highly Efficient Water Electrolysis**

*Jie Yu, Yijun Zhong, Xinhao Wu, Jaka Sunarso, Meng Ni, Wei Zhou,\* and Zongping Shao\**

## Supporting Information

**Bifunctionality from synergy: CoP nanoparticles embedded in amorphous CoOx nanoplates with heterostructures for highly efficient water electrolysis**

*Jie Yu, Yijun Zhong, Xinhao Wu, Jaka Sunarso, Meng Ni, Wei Zhou\* and Zongping Shao\**

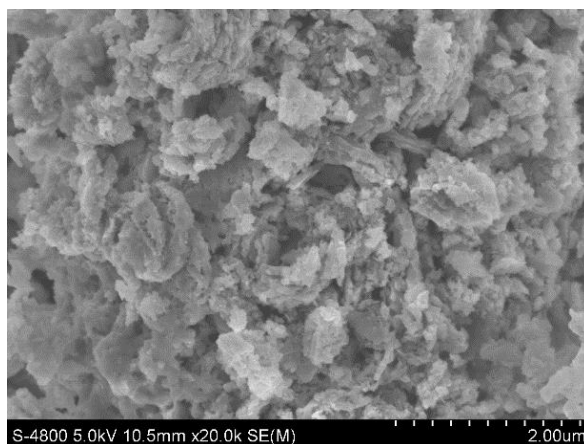

**Figure S1.** SEM image of the CoP b-plate that features disintegrated platelets.

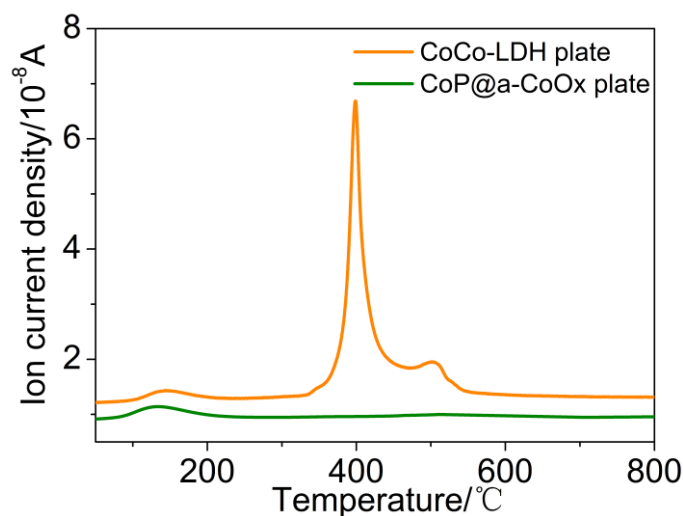

**Figure S2.** The qualitative determination of gas components ( $\text{H}_2\text{O}$ ) of CoCo-LDH plate and CoP@a-CoOx plate during the thermal decomposition process.

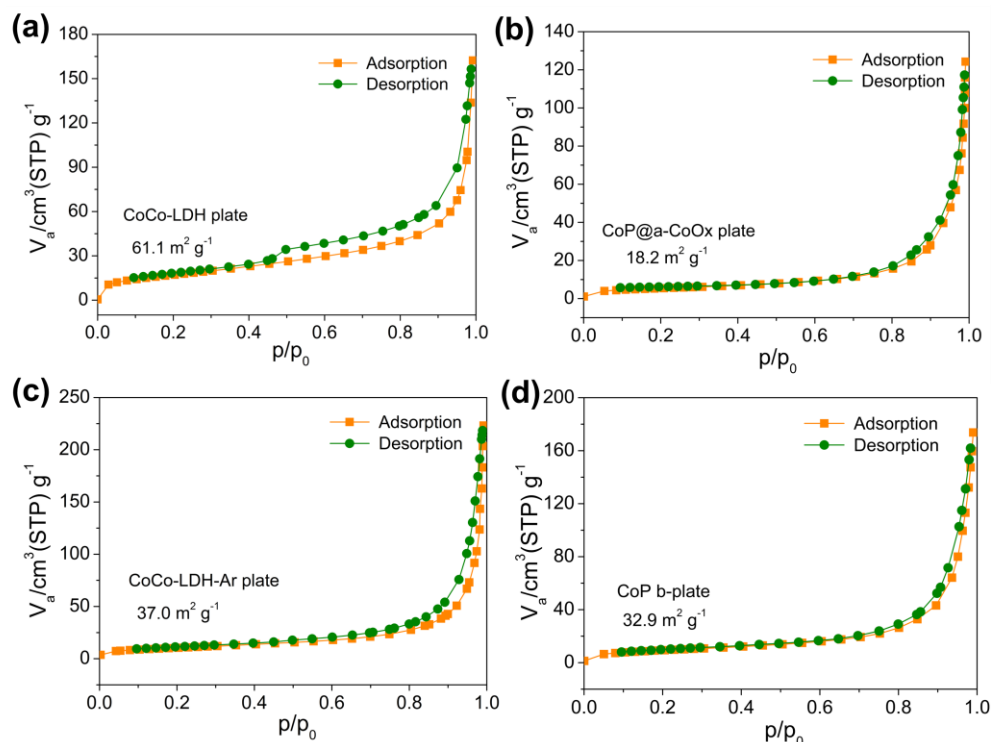

**Figure S3.** Nitrogen adsorption-desorption isotherms of **a)** the CoCo-LDH plate; **b)** the CoP@a-CoOx plate; **c)** the CoCo-LDH-Ar plate; and **d)** the CoP b-plate.

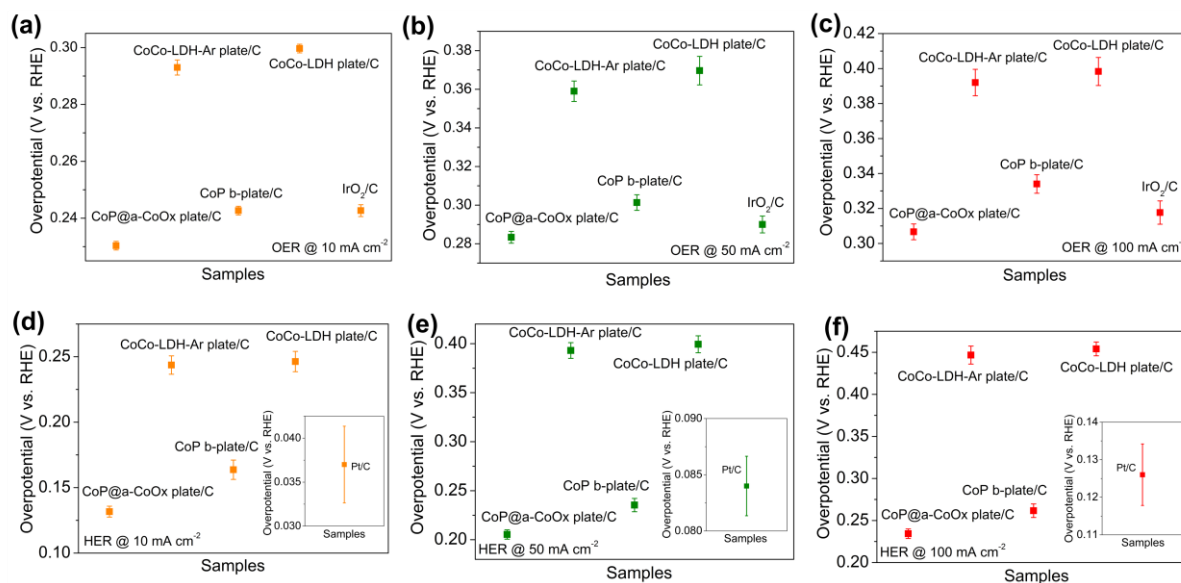

**Figure S4.** Overpotentials at the current densities of **a, d)** 10; **b, e)** 50; and **c, f)** 100  $\text{mA cm}^{-2}$  for both **a-c)** OER and **d-f)** HER among different catalysts, respectively. Error bars represent standard deviations from at least three independent measurements.

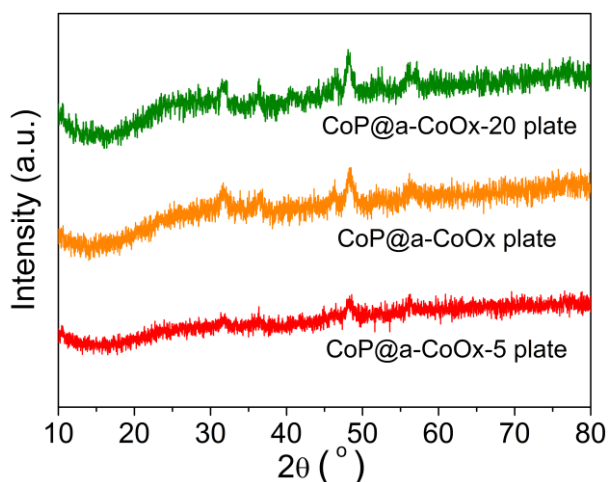

**Figure S5.** Powder XRD patterns of the CoP@a-CoOx-5 plate, the CoP@a-CoOx plate, and the CoP@a-CoOx-20 plate samples.

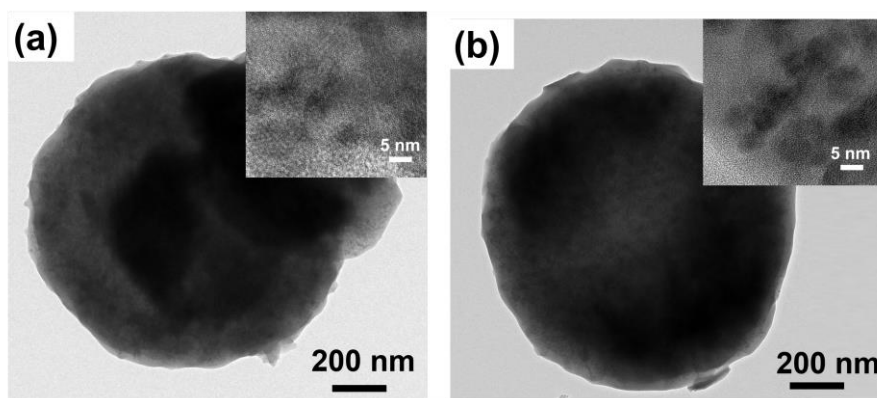

**Figure S6.** TEM images of a) CoP@a-CoOx-5 plate; and b) CoP@a-CoOx-20 plate.

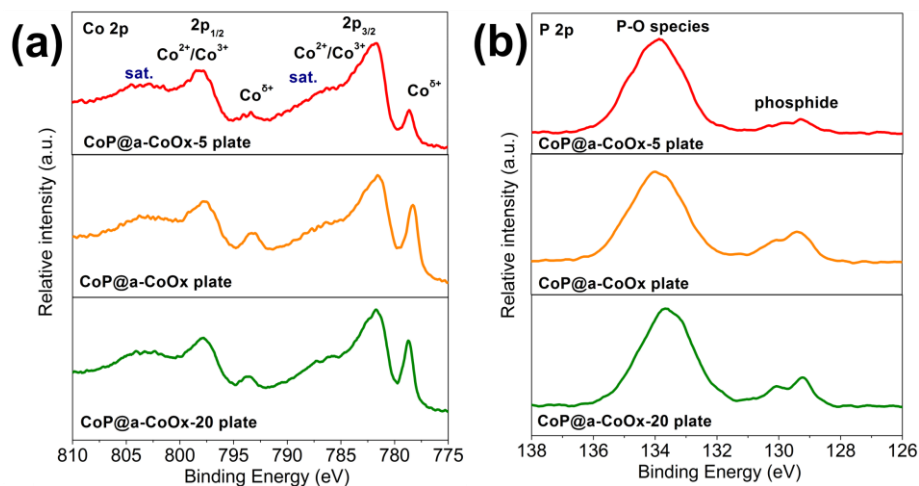

**Figure S7.** High resolution XPS spectra of a) Co 2p; and b) P 2p for CoP@a-CoOx-5 plate, CoP@a-CoOx plate, and CoP@a-CoOx-20 plate.

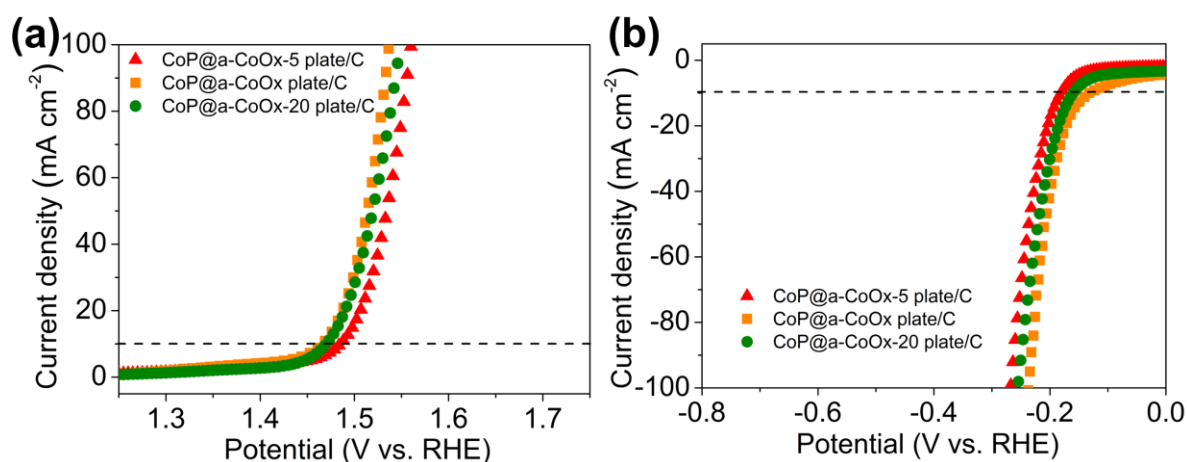

**Figure S8.** **a)** OER polarization curves of the CoP@a-CoOx-5 plate, the CoP@a-CoOx plate, and the CoP@a-CoOx-20 plate samples loaded on the carbon cloth substrate in an O<sub>2</sub>-saturated 1 M KOH solution; obtained using a 5 mV s<sup>-1</sup> scan rate; **b)** HER polarization curves of the CoP@a-CoOx-5 plate, the CoP@a-CoOx plate, and the CoP@a-CoOx-20 plate samples loaded on the carbon cloth substrate in an Ar-saturated 1 M KOH solution; obtained using a 5 mV s<sup>-1</sup> scan rate.

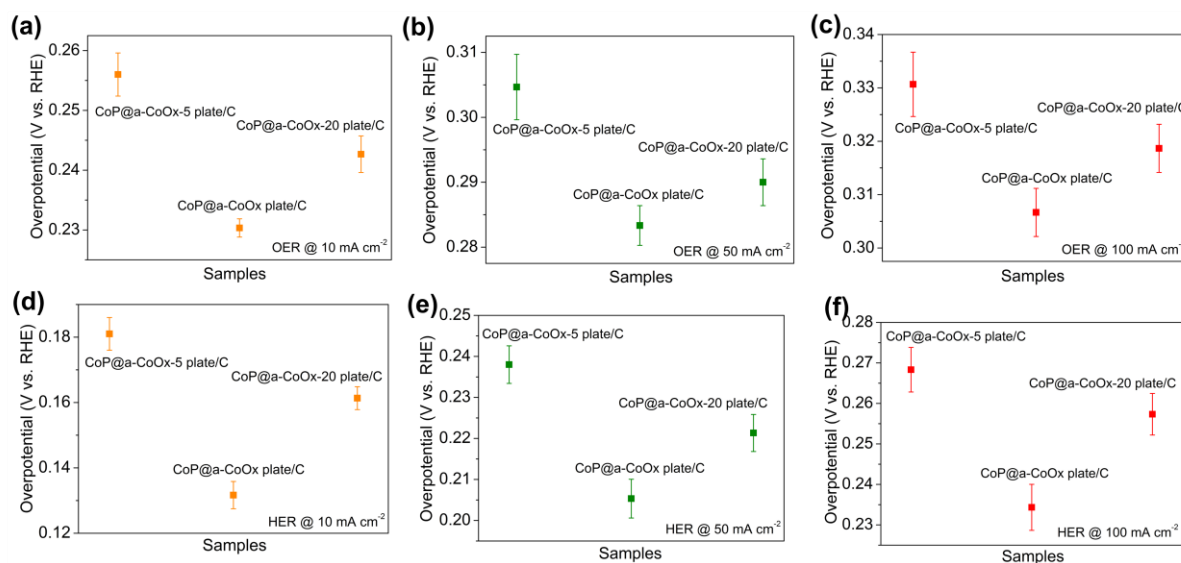

**Figure S9.** Overpotentials at the current densities of **a, d)** 10; **b, e)** 50; and **c, f)** 100 mA cm<sup>-2</sup> for both **a-c)** OER and **d-f)** HER among the CoP@a-CoOx-5 plate, the CoP@a-CoOx plate, and the CoP@a-CoOx-20 plate samples, respectively. Error bars represent standard deviations from at least three independent measurements.

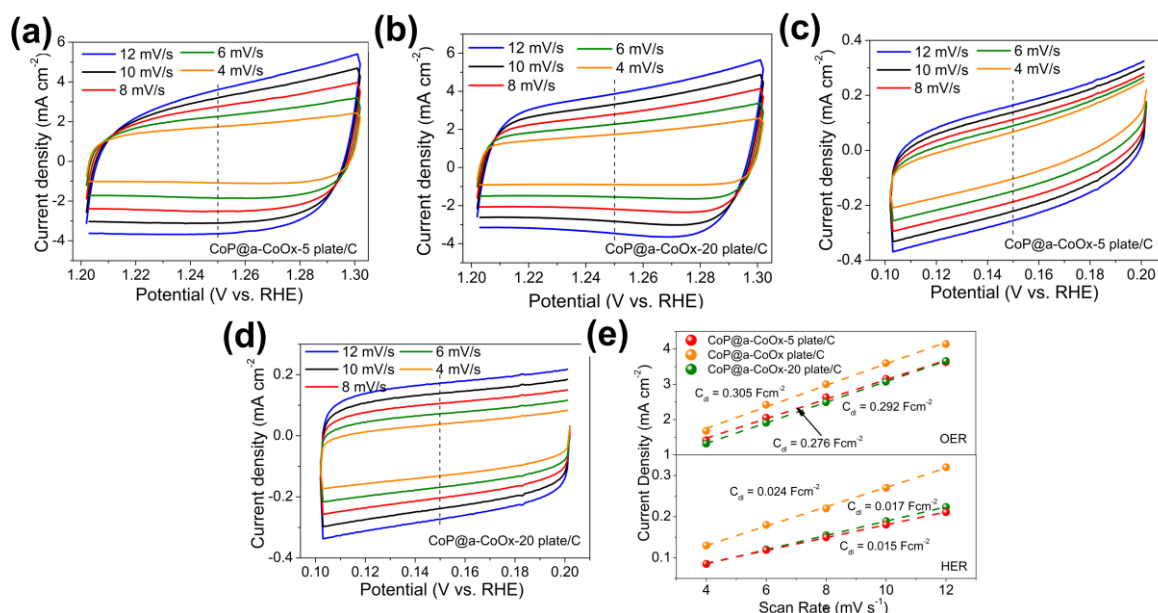

**Figure S10.** Cyclic voltammety profiles for **a)** and **c)** the CoP@a-CoOx-5 plate/C; and **b)** and **d)** the CoP@a-CoOx-20 plate/C at different scan rates (i.e., 4-12  $\text{mV s}^{-1}$ ) in a 1 M KOH solution; and **e)** linear fitting of the capacitive currents versus CV scan rates for the CoP@a-CoOx-5 plate/C, CoP@a-CoOx plate/C, and CoP@a-CoOx-20 plate/C samples for OER and HER.

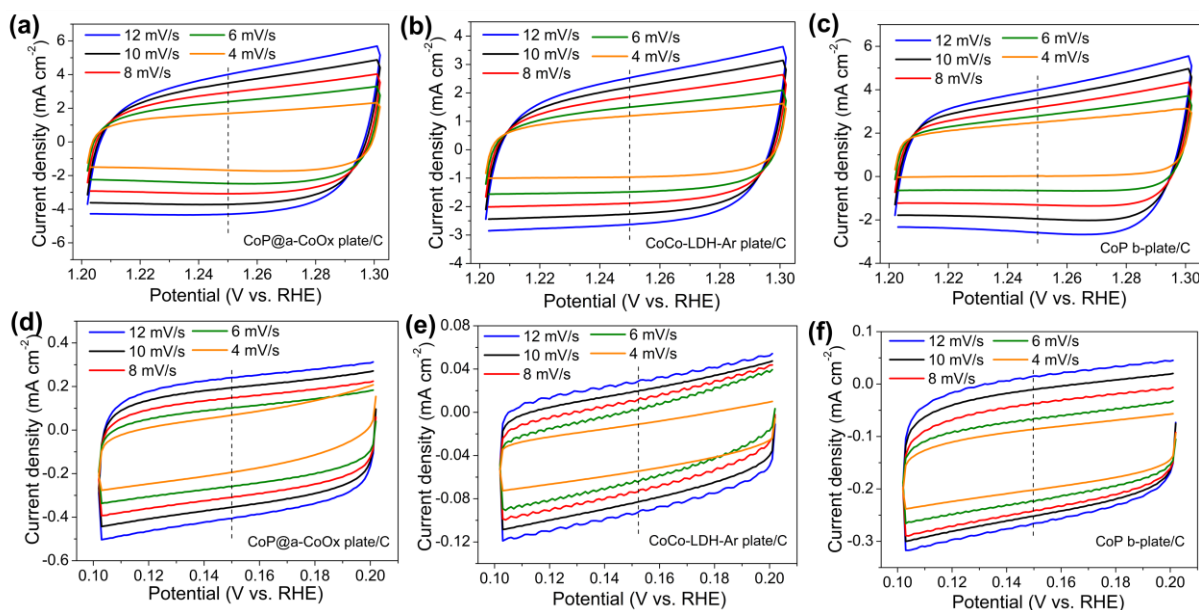

**Figure S11.** Cyclic voltammety profiles for **a)** and **d)** the CoP@a-CoOx plate/C; **b)** and **e)** the CoCo-LDH-Ar plate/C; and **c)** and **f)** the CoP b-plate/C at different scan rates (i.e., 4-12  $\text{mV s}^{-1}$ ) in a 1 M KOH solution; **a), b), and c)** OER; and **d), e), and f)** HER estimated ECSAs.

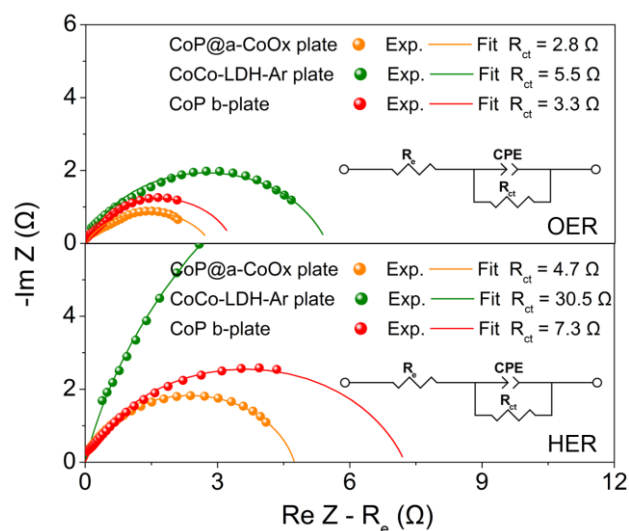

**Figure S12.** Nyquist plots of the CoP@a-CoOx plate, the CoCo-LDH-Ar plate, and the CoP b-plate catalysts obtained from EIS measurements at OER potential of 0.6 V vs. Ag|AgCl (3.5 M KCl) and HER potential of -1.3 V vs. Ag|AgCl (3.5 M KCl).

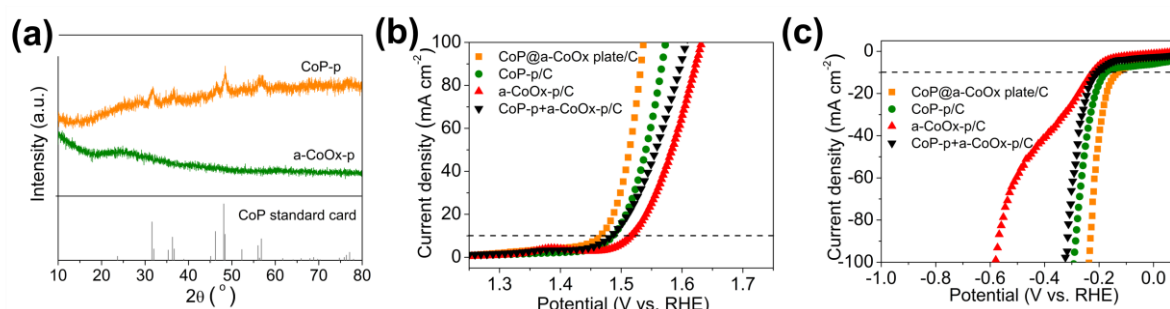

**Figure S13.** a) Powder XRD patterns of the CoP-p, and the a-CoOx-p samples; b) OER polarization curves; and c) HER polarization curves of CoP@a-CoOx plate, CoP-p, a-CoOx-p, and the mixture of CoP-p and a-CoOx-p.

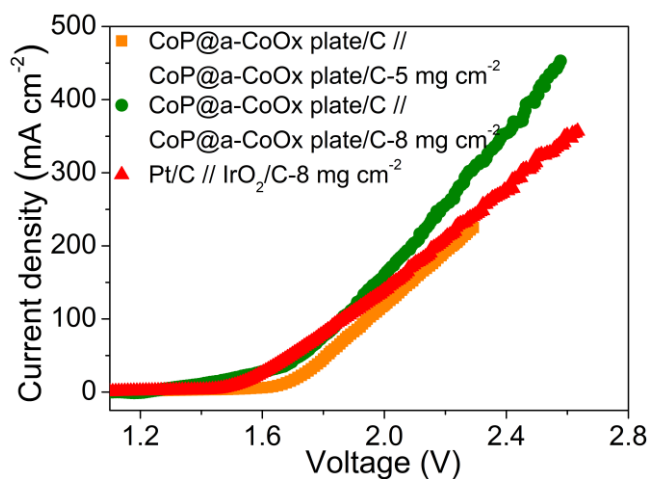

**Figure S14.** Polarization curves of the CoP@a-CoOx plate/C || CoP@a-CoOx plate/C-5 mg cm<sup>-2</sup> system, the CoP@a-CoOx plate/C || CoP@a-CoOx plate/C-8 mg cm<sup>-2</sup> system, and the Pt/C(-) || IrO<sub>2</sub>/C(+)-8 mg cm<sup>-2</sup> system for overall electrochemical water splitting in a 1 M KOH solution.

**Table S1.** Specific surface areas for different samples.

| Sample              | S <sub>BET</sub> <sup>[a]</sup> (m <sup>2</sup> g <sup>-1</sup> ) |
|---------------------|-------------------------------------------------------------------|
| CoCo-LDH plate      | 61.1                                                              |
| CoP@a-CoOx plate    | 18.2                                                              |
| CoCo-LDH-Ar plate   | 37.0                                                              |
| CoP b-plate         | 32.9                                                              |
| CoP@a-CoOx-5 plate  | 21.4                                                              |
| CoP@a-CoOx-20 plate | 17.8                                                              |

[a] S<sub>BET</sub>: specific surface area from BET method.

**Table S2.** Comparison of selected non-precious OER electrocatalysts in an alkaline medium.

| Catalyst                                                            | Electrolyte    | Loading (mg cm <sup>-2</sup> ) | Substrate           | η <sub>10</sub> (V) | Tafel slope (mV dec <sup>-1</sup> ) | References                                            |
|---------------------------------------------------------------------|----------------|--------------------------------|---------------------|---------------------|-------------------------------------|-------------------------------------------------------|
| <b>CoP@a-CoOx plate</b>                                             | <b>1 M KOH</b> | <b>1.5</b>                     | <b>Carbon cloth</b> | <b>0.23</b>         | <b>67</b>                           | <b>This work</b>                                      |
| <b>IrO<sub>2</sub></b>                                              | <b>1 M KOH</b> | <b>1.5</b>                     | <b>Carbon cloth</b> | <b>0.24</b>         | <b>59</b>                           | <b>This work</b>                                      |
| CoP MNA                                                             | 1 M KOH        | 6.2                            | Ni foam             | 0.29                | 65                                  | <i>Adv. Funct. Mater.</i> <b>2015</b> , 25, 7337.     |
| Co <sub>4</sub> N                                                   | 1 M KOH        | 0.82                           | Carbon cloth        | 0.26                | 44                                  | <i>Angew. Chem. Int. Ed.</i> <b>2015</b> , 54, 14710. |
| NiCoP/CC                                                            | 1 M KOH        | 2                              | Carbon cloth        | 0.24                | 64                                  | <i>ACS Catal.</i> <b>2017</b> , 7, 4131.              |
| Co <sub>1.04</sub> Fe <sub>0.96</sub> P                             | 1 M KOH        | 1                              | Self-supported      | 0.27                | 30                                  | <i>Energy Environ. Sci.</i> <b>2016</b> , 9, 2257.    |
| a-NiFe-OH/NiFeP/NF                                                  | 1 M KOH        | 1.8                            | Ni foam             | 0.20                | 39                                  | <i>ACS Energy Lett.</i> <b>2017</b> , 2, 1035.        |
| CoN-1min                                                            | 1 M KOH        | 1.5                            | Ni foam             | 0.29                | 70                                  | <i>Angew. Chem. Int. Ed.</i> <b>2016</b> , 55, 8670.  |
| Fe-Ni oxides                                                        | 1 M KOH        | 0.5                            | Carbon paper        | >0.37               | 51                                  | <i>ACS Catal.</i> <b>2012</b> , 2, 1793.              |
| Co-P film                                                           | 1 M KOH        | 2.71                           | Cu foil             | 0.34                | 47                                  | <i>Angew. Chem. Int. Ed.</i> <b>2015</b> , 54, 6251.  |
| CoCo LDH                                                            | 1 M KOH        | 1                              | Ni foam             | 0.39                | 59                                  | <i>Nat. Commun.</i> <b>2014</b> , 5, 4477.            |
| Zn <sub>0.75</sub> Co <sub>2.25</sub> O <sub>4</sub> nanowire array | 1 M KOH        | 1                              | Ti foil             | 0.32                | 51                                  | <i>Chem. Mater.</i> <b>2014</b> , 26, 1889.           |

**Table S3.** Comparison of selected non-precious HER electrocatalysts in an alkaline medium.

| Catalyst | Electrolyte | Loading | Substrate | η <sub>10</sub> | Tafel slope | References |
|----------|-------------|---------|-----------|-----------------|-------------|------------|
|----------|-------------|---------|-----------|-----------------|-------------|------------|



|                                        |                | (mg cm <sup>-2</sup> )                       |                     | (V)         | (mV dec <sup>-1</sup> ) |                                                                    |
|----------------------------------------|----------------|----------------------------------------------|---------------------|-------------|-------------------------|--------------------------------------------------------------------|
| <b>CoP@a-CoOx plate</b>                | <b>1 M KOH</b> | <b>1.5</b>                                   | <b>Carbon cloth</b> | <b>0.13</b> | <b>89</b>               | <b>This work</b>                                                   |
| CoP/CC                                 | 1 M KOH        | 0.92                                         | Carbon cloth        | 0.21        | 129                     | <i>J. Am. Chem. Soc.</i> <b>2014</b> , <i>136</i> , 7587.          |
| Ni <sub>2</sub> P                      | 1 M KOH        | 176.9                                        | Ti foil             | 0.07        | 118                     | <i>Energy Environ. Sci.</i> <b>2015</b> , <i>8</i> , 1027.         |
| NiO/Ni-CNT                             | 1 M KOH        | 8                                            | Ni foam             | <0.1        | 51                      | <i>Nat. Commun.</i> <b>2014</b> , <i>5</i> , 4695.                 |
| WP NAs/CC                              | 1 M KOH        | 2                                            | Carbon cloth        | 0.15        | 102                     | <i>ACS Appl. Mater. Interfaces</i> <b>2014</b> , <i>6</i> , 21874. |
| FeP NAs/CC                             | 1 M KOH        | 1.5                                          | Carbon cloth        | 0.22        | 146                     | <i>ACS Catal.</i> <b>2014</b> , <i>4</i> , 4065.                   |
| HNDKM-Co/CoP                           | 1 M KOH        | 42.8mg <sub>Co</sub> /<br>g <sub>total</sub> | Self-supported      | 0.13<br>5   | 64                      | <i>ACS Nano</i> <b>2017</b> , <i>11</i> , 4358.                    |
| NiCo <sub>2</sub> S <sub>4</sub> NW/NF | 1 M KOH        | ---                                          | Ni foam             | 0.21        | 59                      | <i>Adv. Funct. Mater.</i> <b>2016</b> , <i>26</i> , 4661.          |
| CP@Ni-P                                | 1 M KOH        | 25.8                                         | Carbon paper        | 0.12        | 85                      | <i>Adv. Funct. Mater.</i> <b>2016</b> , <i>26</i> , 4067.          |

**Table S4.** The actual content of the crystalline CoP nanoclusters in these heterostructure catalysts.

| Sample              | The content of CoP (wt %) |
|---------------------|---------------------------|
| CoP@a-CoOx-5 plate  | 13.4                      |
| CoP@a-CoOx plate    | 37.2                      |
| CoP@a-CoOx-20 plate | 42.3                      |

To obtain the actual content of the crystalline CoP nanoclusters in these heterostructure catalysts, inductively coupled plasma-optical emission spectrometry (ICP-OES) measurements were performed. Specifically, 20 mg of a catalyst was absolutely dissolved into a certain amount of concentrated nitric acid, and then it was diluted to 1 L with the addition of deionized water. The amount of cobalt and phosphorus in this solution was quantified using ICP-OES. For the CoP@a-CoOx plate sample, the amount of cobalt and phosphorus was 14.03 mg/L (14.03 ppm) and 2.56 mg/L (2.56 ppm) in the obtained solution, respectively. Thus, the actual content of the crystalline CoP nanoclusters in this hybrid can be calculated as follows:  $2.56/30.97 \times (58.93+30.97)/20 = 37.2\%$ .

**Table S5.** Comparison of the performance of the water-splitting catalysts in a 1.0 M KOH solution.

| Anode                   | Cathode                 | Substrate           | Loading (mg cm <sup>-2</sup> ) | $\eta_{10}$ (V) | References       |
|-------------------------|-------------------------|---------------------|--------------------------------|-----------------|------------------|
| <b>CoP@a-CoOx plate</b> | <b>CoP@a-CoOx plate</b> | <b>Carbon cloth</b> | <b>5</b>                       | <b>1.66</b>     | <b>This work</b> |

| <b>IrO<sub>2</sub>/C</b>                                    | <b>Pt/C</b>                                                 | <b>Carbon cloth</b>      | <b>5</b> | <b>1.59</b> | <b>This work</b>                                    |
|-------------------------------------------------------------|-------------------------------------------------------------|--------------------------|----------|-------------|-----------------------------------------------------|
| NiFe LDHs                                                   | NiFe LDHs                                                   | Ni foam                  | ---      | 1.70        | <i>Science</i> <b>2014</b> , 345, 1593.             |
| Co <sub>0.85</sub> Se/NiFe-LDH                              | Co <sub>0.85</sub> Se/NiFe-LDH                              | Exfoliated graphene foil | 4        | 1.67        | <i>Energy Environ. Sci.</i> <b>2016</b> , 9, 478.   |
| High-index faceted Ni <sub>3</sub> S <sub>2</sub> nanosheet | High-index faceted Ni <sub>3</sub> S <sub>2</sub> nanosheet | Ni foam                  | 1.6      | >1.7        | <i>J. Am. Chem. Soc.</i> <b>2015</b> , 137, 14023.  |
| Co <sub>2</sub> B-500                                       | Co <sub>2</sub> B-500/NG                                    | Carbon cloth             | 5        | 1.81        | <i>Adv. Energy Mater.</i> <b>2016</b> , 6, 1502313. |
| Co-P                                                        | Co-P                                                        | Ni foam                  | 2.6      | ~ 1.64      | <i>Angew. Chem.</i> <b>2015</b> , 127, 6349.        |
| SNCF-NR                                                     | SNCF-NR                                                     | Ni foam                  | 3        | 1.68        | <i>Adv. Energy Mater.</i> <b>2017</b> , 7, 1602122. |
| Co/CoP-5                                                    | Co/CoP-5                                                    | Ni foam                  | 5        | 1.45        | <i>Adv. Energy Mater.</i> <b>2017</b> , 7, 1602355. |
| Ni/NiP                                                      | Ni/NiP                                                      | Ni foam                  | 10.58    | 1.61        | <i>Adv. Funct. Mater.</i> <b>2016</b> , 26, 3314.   |
| NiSe/NF                                                     | NiSe/NF                                                     | Ni foam                  | 2.8      | 1.63        | <i>Angew. Chem.</i> <b>2015</b> , 127, 9483.        |

---
